# Supplementary material for: Changing sex for selfish gain: B chromosomes of Lake Malawi cichlid fish
Source: PubMed Central journal article supplement (PMC6934658; doi:10.1038/s41598-019-55774-8), 2019-12-27
Supplement: 41598_2019_55774_MOESM1_ESM.pdf [file 41598_2019_55774_MOESM1_ESM.pdf]

Changing sex for selfish gain: B chromosomes of Lake Malawi cichlid fish  
Clark and Kocher

| Family | Cross type | Initial # of progeny | # with recorded B/NoB genotype | # with recorded sex |
|--------|------------|----------------------|--------------------------------|---------------------|
| A008   | B          | 32                   | 20                             | 20                  |
| A018   | B          | 43                   | 26                             | 17                  |
| A035   | B          | 17                   | 16                             | 13                  |
| A036   | B          | 41                   | 29                             | 20                  |
| A038   | B          | 35                   | 24                             | 23                  |
| A040   | B          | 41                   | 38                             | 0                   |
| A003   | NoB        | 35                   | -                              | 7                   |
| A006   | NoB        | 39                   | -                              | 13                  |
| A009   | NoB        | 36                   | -                              | 11                  |
| A011   | NoB        | 35                   | -                              | 16                  |
| A013   | NoB        | 48                   | -                              | 6                   |
| A017   | NoB        | 45                   | -                              | 6                   |
| A022   | NoB        | 64                   | -                              | 10                  |
| A024   | NoB        | 39                   | -                              | 6                   |
| A026   | NoB        | 31                   | -                              | 9                   |
| A027   | NoB        | 43                   | -                              | 21                  |
| A028   | NoB        | 40                   | -                              | 21                  |
| A029   | NoB        | 15                   | -                              | 10                  |
| A032   | NoB        | 42                   | -                              | 11                  |
| A033   | NoB        | 29                   | -                              | 19                  |
| A034   | NoB        | 53                   | -                              | 18                  |

**Supplementary Table S1.** Sample Information. The 21 *Metriaclima lombardoi* families used in this study are listed with information regarding cross type, family size and the data collected from each family. The number of individuals initially collected from the mother (dam) for each family is reported in the 3rd column. Individuals were euthanized after reaching sexual maturity (approximately 9 months) and inspected for testes or ovaries to confirm sex. Fin tissue was collected either after euthanasia or discovery of early mortality. Not all fin tissue collected after early mortality yielded viable DNA. Mortality prior to sexual maturation resulted in individuals for which sex could not be determined. The 4th and 5th columns show the number of individuals of each family for which genotype (B presence or absence) and sex was determined, respectively. Please note, difficulties establishing this laboratory line (mainly bacterial infections) led to high and variable mortality rates. Interpretation of any correlation between mortality rates and other factors (such as B chromosome presence) is therefore likely confounded and misleading.

**Supplementary Figure S1.** Sex-linkage for nine families (six families with B chromosomes and 3 families without B chromosomes). The families from Figures 2 and 3 are included in this figure. The allele sizes of two microsatellite markers (UNH2086 and UNH2031) known to be tightly linked with the LG7 XY sex determination system [46] are shown. For each family, the parental haplotypes are shown above those of the offspring. The haplotypes inherited from the mother (dam) are shown in light and dark pink while the haplotypes inherited from the father (sire) are shown in light and dark blue. Gray indicates that the two alleles of the parent were of identical size and could not be differentiated. The letters ND indicate “no data” where quality data could not be obtained. Sex, sample ID and genotype are reported for progeny of NoB families. Presence or absence of a B chromosome, sex, sample ID and genotype are reported for progeny of B families, with the exception of family A040 where sex was not able to be determined due to premature death of all individuals. Please note, only NoB individuals of each family for which sex and genotype data was obtained or B individuals for which genotype data was obtained are included in this figure. NoB individuals missing one or both of these data types, and B individuals missing genotype data were excluded for simplicity.

## B Families

| <u>Family: A008</u> |     |           | Maternal haplotype |         | Paternal haplotype |         |
|---------------------|-----|-----------|--------------------|---------|--------------------|---------|
|                     |     | Markers:  | UNH2086            | UNH2031 | UNH2086            | UNH2031 |
|                     |     |           | 151                | 175     | 153                | 147     |
|                     |     |           | 184                | 150     | 140                | 160     |
| B?                  | Sex | Sample ID |                    |         |                    |         |
| B                   | F   | 2015-1166 | 184                | ND      | 153                | ND      |
| B                   | F   | 2015-1167 | 151                | 175     | 153                | 147     |
| B                   | F   | 2016-1010 | 184                | 150     | 140                | 160     |
| B                   | F   | 2016-1012 | 151                | 175     | 153                | 147     |
| B                   | F   | 2016-1013 | 184                | 150     | 153                | 147     |
| B                   | F   | 2016-1014 | 184                | 150     | 140                | 160     |
| B                   | F   | 2016-1015 | 151                | 175     | 153                | 147     |
| B                   | F   | 2016-1016 | 184                | 150     | 153                | 147     |
| B                   | F   | 2016-1017 | 184                | 150     | 153                | 147     |
| B                   | F   | 2016-1018 | 184                | 150     | 153                | 147     |
| B                   | F   | 2016-1019 | 151                | 175     | 153                | 147     |
| B                   | F   | 2016-1020 | 151                | 175     | 140                | 160     |
| B                   | F   | 2016-1021 | 184                | 150     | 140                | 160     |
| B                   | F   | 2016-1022 | 184                | 150     | 140                | 160     |
| B                   | F   | 2016-1023 | 184                | 150     | 140                | 160     |
| B                   | F   | 2016-1024 | 151                | ND      | 140                | ND      |
| B                   | F   | 2016-1025 | 184                | 150     | 140                | 160     |
| B                   | F   | 2016-1026 | 184                | 150     | 140                | 160     |
| B                   | F   | 2016-1027 | 151                | 175     | 140                | 160     |
| NoB                 | M   | 2016-1011 | 151                | 175     | 140                | 160     |

| <u>Family: A018</u> |     |           | Maternal haplotype |         | Paternal haplotype |         |
|---------------------|-----|-----------|--------------------|---------|--------------------|---------|
|                     |     | Markers:  | UNH2086            | UNH2031 | UNH2086            | UNH2031 |
|                     |     |           | 158                | 158     | 172                | 154     |
|                     |     |           | 184                | 156     | 170                | 154     |
| B?                  | Sex | Sample ID |                    |         |                    |         |
| B                   | F   | 2016-1521 | 184                | 156     | 170                | 154     |
| B                   | F   | 2016-1526 | 158                | ND      | 172                | 154     |
| B                   | F   | 2016-1530 | 184                | 156     | 170                | 154     |
| B                   | F   | 2016-1531 | 158                | 158     | 172                | 154     |
| B                   | F   | 2016-1534 | 184                | 156     | 170                | 154     |
| B                   | F   | 2016-1540 | 158                | 158     | 172                | 154     |
| B                   | F   | 2016-1541 | 184                | 156     | 172                | 154     |
| B                   | F   | 2016-1542 | 184                | 156     | 172                | 154     |
| B                   | F   | 2016-1544 | 184                | 156     | 172                | 154     |
| B                   | F   | 2016-1547 | 158                | 158     | 170                | 154     |
| B                   | F   | 2017-1002 | 158                | ND      | 172                | 154     |
| B                   | F   | 2016-1524 | 184                | ND      | 170                | 154     |
| B                   | F   | 2016-1525 | 158                | ND      | 172                | 154     |
| B                   | ND  | 2016-1527 | 184                | 156     | 170                | 154     |
| B                   | ND  | 2016-1543 | 184                | 156     | 172                | 154     |
| B                   | ND  | 2016-1330 | 158                | 158     | 172                | 154     |
| NoB                 | F   | 2016-1522 | 184                | 156     | 172                | 154     |
| NoB                 | M   | 2016-1528 | 158                | 158     | 170                | 154     |
| NoB                 | M   | 2016-1533 | 184                | 156     | 170                | 154     |
| NoB                 | M   | 2016-1538 | 184                | 156     | 170                | 154     |

**Family: A035**

| B?  | Sex | Sample ID | Maternal haplotype |         | Paternal haplotype |         |
|-----|-----|-----------|--------------------|---------|--------------------|---------|
|     |     |           | Markers:           |         | UNH2086            | UNH2031 |
|     |     |           | UNH2086            | UNH2031 | UNH2086            | UNH2031 |
|     |     |           | 158                | 158     | 188                | 162     |
|     |     |           | 172                | 153     | 154                | 149     |
| B   | F   | 2017-1037 | 172                | 153     | 188                | 162     |
| B   | F   | 2017-1042 | 158                | 158     | 154                | 149     |
| B   | F   | 2017-1043 | 172                | 153     | 188                | 162     |
| B   | F   | 2017-1044 | 172                | 153     | 188                | 162     |
| B   | F   | 2017-1045 | 158                | 158     | 154                | 149     |
| B   | ND  | 2018-1003 | 172                | 153     | 188                | 162     |
| B   | ND  | 2018-1004 | 172                | 153     | 154                | 149     |
| NoB | F   | 2017-1036 | 172                | 153     | 188                | 162     |
| NoB | F   | 2017-1041 | 172                | 153     | 188                | 162     |
| NoB | F   | 2017-1040 | 158                | 158     | 188                | 162     |
| NoB | M   | 2017-1034 | 158                | 153     | 154                | 149     |
| NoB | M   | 2017-1035 | 158                | 158     | 154                | 149     |
| NoB | M   | 2017-1038 | 172                | 153     | 154                | 149     |
| NoB | M   | 2017-1039 | 172                | 153     | 154                | 149     |

**Family: A036**

| B?  | Sex | Sample ID | Maternal haplotype |         | Paternal haplotype |         |
|-----|-----|-----------|--------------------|---------|--------------------|---------|
|     |     |           | Markers:           |         | UNH2086            | UNH2031 |
|     |     |           | UNH2086            | UNH2031 | UNH2086            | UNH2031 |
|     |     |           | 170                | 156     | 188                | 162     |
|     |     |           | 184                | 156     | 154                | 149     |
| B   | F   | 2018-1087 | 184                | 156     | 154                | 149     |
| B   | F   | 2018-1088 | 170                | 156     | 188                | 162     |
| B   | F   | 2018-1089 | 184                | 156     | 188                | 162     |
| B   | F   | 2018-1231 | 170                | 156     | 188                | 162     |
| B   | F   | 2018-1232 | 170                | 156     | 154                | 149     |
| B   | F   | 2018-1233 | 170                | 156     | 188                | 162     |
| B   | F   | 2018-1234 | 184                | 156     | 188                | 162     |
| B   | F   | 2018-1235 | 184                | 156     | 154                | 149     |
| B   | F   | 2018-1236 | 170                | 156     | 188                | 162     |
| B   | F   | 2018-1237 | 170                | 156     | 188                | 162     |
| B   | F   | 2018-1238 | ND                 | 156     | ND                 | 162     |
| B   | ND  | 2017-1013 | 170                | 156     | 154                | 149     |
| B   | ND  | 2018-1037 | 170                | 156     | 188                | 162     |
| B   | ND  | 2018-1039 | 184                | 156     | 154                | 149     |
| B   | ND  | 2018-1040 | 170                | 156     | 154                | 149     |
| NoB | F   | 2018-1030 | 184                | 156     | 188                | 162     |
| NoB | F   | 2018-1071 | 184                | 156     | 188                | 162     |
| NoB | F   | 2018-1073 | 170                | 156     | 188                | 162     |
| NoB | M   | 2018-1029 | 170                | 156     | 154                | 149     |
| NoB | M   | 2018-1082 | 170                | 156     | 154                | 149     |
| NoB | M   | 2018-1083 | 170                | 156     | 154                | 149     |
| NoB | M   | 2018-1084 | 184                | 156     | 154                | 149     |
| NoB | M   | 2018-1085 | 170                | 156     | 154                | 149     |
| NoB | M   | 2018-1086 | 184                | 156     | 154                | 149     |

Family: A038

|     | B? | Sex | Sample ID | Maternal haplotype |         | Paternal haplotype |         |
|-----|----|-----|-----------|--------------------|---------|--------------------|---------|
|     |    |     |           | Markers:           | UNH2086 | UNH2031            | UNH2086 |
|     |    |     |           | 172                | 154     | 167                | 152     |
|     |    |     |           | 184                | 156     | 190                | 132     |
| B?  |    |     |           |                    |         |                    |         |
| B   | F  |     | 2018-1211 | 172                | 154     | 190                | 132     |
| B   | F  |     | 2018-1212 | 184                | 156     | 190                | 132     |
| B   | F  |     | 2018-1215 | ND                 | 154     | 167                | 152     |
| B   | F  |     | 2018-1216 | 184                | 156     | 190                | 132     |
| B   | F  |     | 2018-1217 | 172                | 154     | 167                | 152     |
| B   | F  |     | 2018-1218 | 184                | 156     | 167                | 152     |
| B   | F  |     | 2018-1220 | 184                | 156     | 190                | 132     |
| B   | F  |     | 2018-1225 | 172                | 154     | 167                | 152     |
| B   | F  |     | 2018-1227 | 172                | 154     | 190                | 132     |
| B   | F  |     | 2018-1228 | 184                | 156     | 167                | 152     |
| B   | F  |     | 2018-1230 | 184                | 156     | 167                | 152     |
| B   | F  |     | 2018-1229 | 184                | 156     | 190                | 132     |
| B   | F  |     | 2018-1226 | 172                | 154     | 167                | 152     |
| B   | ND |     | 2017-1056 | 184                | 156     | 167                | 152     |
| NoB | F  |     | 2018-1223 | 172                | 154     | 167                | 152     |
| NoB | F  |     | 2018-1224 | 172                | 154     | 167                | 152     |
| NoB | F  |     | 2018-1214 | 172                | 154     | 167                | 152     |
| NoB | F  |     | 2018-1221 | 184                | 156     | 167                | 152     |
| NoB | F  |     | 2018-1222 | 184                | 156     | 167                | 152     |
| NoB | M  |     | 2018-1075 | 184                | 156     | 190                | 132     |
| NoB | M  |     | 2018-1210 | 172                | 154     | 190                | 132     |
| NoB | M  |     | 2018-1213 | 172                | 154     | 190                | 132     |
| NoB | M  |     | 2018-1219 | 172                | 154     | 190                | 132     |
| NoB | M  |     | 2018-1077 | 184                | 156     | 190                | 132     |

**Family: A040**

|     |           | Maternal haplotype |         | Paternal haplotype |         |
|-----|-----------|--------------------|---------|--------------------|---------|
|     |           | UNH2086            | UNH2031 | UNH2086            | UNH2031 |
|     |           | 172                | 156     | 167                | 152     |
|     |           | 184                | 156     | 190                | 132     |
| B?  | Sample ID |                    |         |                    |         |
| B   | 2018-1206 | 184                | 156     | 190                | 132     |
| B   | 2018-1251 | 172                | 156     | 167                | 152     |
| B   | 2018-1252 | 184                | 156     | 167                | 152     |
| B   | 2018-1300 | 172                | 156     | 190                | 132     |
| B   | 2019-1001 | 172                | 156     | 190                | 132     |
| B   | 2018-1041 | 184                | 156     | 167                | 152     |
| B   | 2018-1042 | 184                | 156     | 190                | 132     |
| B   | 2018-1044 | 184                | 156     | 190                | 132     |
| B   | 2018-1046 | 172                | 156     | 167                | 152     |
| B   | 2018-1047 | 184                | 156     | 190                | 132     |
| B   | 2018-1048 | 172                | 156     | 167                | 152     |
| B   | 2018-1049 | 184                | 156     | 190                | 132     |
| B   | 2018-1050 | 172                | 156     | 190                | 132     |
| B   | 2018-1052 | 172                | 156     | 167                | 152     |
| B   | 2018-1053 | 184                | 156     | 167                | 152     |
| B   | 2018-1055 | 172                | 156     | 190                | 132     |
| B   | 2018-1056 | 172                | 156     | 167                | 152     |
| B   | 2018-1057 | 184                | 156     | 190                | 132     |
| B   | 2018-1058 | 172                | 156     | 190                | 132     |
| B   | 2018-1060 | 172                | 156     | 167                | 152     |
| B   | 2018-1061 | 172                | 156     | 167                | 152     |
| B   | 2018-1063 | 184                | 156     | 167                | 152     |
| B   | 2018-1064 | 184                | 156     | 167                | 152     |
| B   | 2018-1065 | 172                | 156     | 190                | 132     |
| B   | 2018-1066 | 172                | 156     | 190                | 132     |
| B   | 2018-1067 | 184                | 156     | 167                | 152     |
| B   | 2018-1068 | 184                | 156     | 167                | 152     |
| B   | 2018-1069 | 184                | 156     | 167                | 152     |
| B   | 2018-1070 | 184                | 156     | 167                | 152     |
| NoB | 2018-1264 | ND                 | ND      | 167                | ND      |
| NoB | 2018-1299 | 184                | 156     | 167                | 152     |
| NoB | 2018-1239 | 184                | 156     | 190                | 132     |
| NoB | 2018-1043 | 184                | 156     | 167                | 152     |
| NoB | 2018-1045 | 184                | 156     | 190                | 132     |
| NoB | 2018-1051 | 184                | 156     | 167                | 152     |
| NoB | 2018-1054 | 172                | 156     | 190                | 132     |
| NoB | 2018-1059 | 184                | 156     | 167                | 152     |
| NoB | 2018-1062 | 184                | 156     | 190                | 132     |

## NoB Families

|     |           | Maternal haplotype |         | Paternal haplotype |         |         |
|-----|-----------|--------------------|---------|--------------------|---------|---------|
|     |           | Markers:           | UNH2086 | UNH2031            | UNH2086 | UNH2031 |
|     |           |                    | 167     | 190                | 169     | 156     |
|     |           |                    | 157     | 175                | 159     | 129     |
| Sex | Sample ID |                    |         |                    |         |         |
| F   | 2015-1169 |                    | 167     | 190                | 169     | 156     |
| F   | 2015-1170 |                    | 167     | 190                | 169     | 156     |
| F   | 2015-1171 |                    | 157     | 175                | 169     | 156     |
| F   | 2015-1172 |                    | 167     | 190                | 169     | 156     |
| M   | 2015-1173 |                    | 157     | 175                | 159     | 129     |
| M   | 2015-1174 |                    | 157     | 175                | 159     | 129     |
| M   | 2015-1175 |                    | 167     | 190                | 159     | 129     |

|     |           | Maternal haplotype |         | Paternal haplotype |         |         |
|-----|-----------|--------------------|---------|--------------------|---------|---------|
|     |           | Markers:           | UNH2086 | UNH2031            | UNH2086 | UNH2031 |
|     |           |                    | 184     | 150                | 142     | 160     |
|     |           |                    | 187     | 160                | 153     | 148     |
| Sex | Sample ID |                    |         |                    |         |         |
| F   | 2015-1177 |                    | 187     | 160                | 142     | 160     |
| F   | 2015-1178 |                    | 184     | 150                | 142     | 160     |
| F   | 2016-1001 |                    | 184     | 150                | 142     | 160     |
| F   | 2016-1002 |                    | 184     | 150                | 142     | 160     |
| F   | 2016-1003 |                    | 184     | 150                | 142     | 160     |
| F   | 2016-1004 |                    | 184     | 150                | 142     | 160     |
| F   | 2016-1006 |                    | 184     | 150                | 142     | 160     |
| F   | 2016-1007 |                    | 184     | 150                | 142     | 160     |
| M   | 2015-1176 |                    | 184     | 150                | 153     | 148     |
| M   | 2015-1179 |                    | 184     | 150                | 153     | 148     |
| M   | 2015-1180 |                    | 184     | 150                | 153     | 148     |
| M   | 2016-1005 |                    | 187     | 160                | 153     | 148     |
| M   | 2016-1009 |                    | 184     | 150                | 153     | 148     |

|     |           | Maternal haplotype |         | Paternal haplotype |         |         |
|-----|-----------|--------------------|---------|--------------------|---------|---------|
|     |           | Markers:           | UNH2086 | UNH2031            | UNH2086 | UNH2031 |
|     |           |                    | 160     | 165                | 141     | 161     |
|     |           |                    | 124     | 123                | 151     | 148     |
| Sex | Sample ID |                    |         |                    |         |         |
| F   | 2016-1033 |                    | 124     | 123                | 141     | 161     |
| F   | 2016-1034 |                    | 160     | 165                | 141     | 161     |
| F   | 2016-1035 |                    | 160     | 165                | 141     | 161     |
| F   | 2016-1036 |                    | 124     | 123                | 141     | 161     |
| F   | 2016-1037 |                    | 160     | 165                | 141     | 161     |
| F   | 2016-1038 |                    | 124     | 123                | 141     | 161     |
| M   | 2016-1028 |                    | 124     | 123                | 151     | 148     |
| M   | 2016-1029 |                    | 160     | 165                | 151     | 148     |
| M   | 2016-1030 |                    | 124     | 123                | 151     | 148     |
| M   | 2016-1031 |                    | 160     | 165                | 151     | 148     |
| M   | 2016-1032 |                    | 160     | 165                | 151     | 148     |
